# Supplementary material for: Tmc2 expression partially restores auditory function in a mouse model of DFNB7/B11 deafness caused by loss of Tmc1 function
Source: PubMed Central journal article supplement (PMC6092339; doi:10.1038/s41598-018-29709-8), 2018-08-14
Supplement: 41598_2018_29709_MOESM1_ESM.pdf [file 41598_2018_29709_MOESM1_ESM.pdf]

## Supplementary Information

### ***Tmc2* expression partially rescues auditory function in a mouse model of DFNB7/B11 deafness caused by loss of *Tmc1* function**

Hiroshi Nakanishi<sup>1</sup>, Kiyoto Kurima<sup>1</sup>, Bifeng Pan<sup>2</sup>, Philine Wangemann<sup>3</sup>, Tracy S. Fitzgerald<sup>4</sup>, Gwenaëlle S. Géléoc<sup>2</sup>, Jeffrey Holt<sup>2</sup>, Andrew J. Griffith<sup>1\*</sup>

1. Otolaryngology Branch, National Institute on Deafness and Other Communication Disorders (NIDCD), NIH, Bethesda, Maryland 20892, USA

2. Department of Otolaryngology and Neurology, F. M. Kirby Neurobiology Center, Boston Children's Hospital, Harvard Medical School, Boston, Massachusetts 02115, USA

3. Anatomy and Physiology Department, Kansas State University, Manhattan, Kansas 66506, USA

4. Mouse Auditory Testing Core Facility, NIDCD, NIH, Bethesda, Maryland 20892, USA

Correspondence should be addressed to A.J.G. (email: [griffita@nidcd.nih.gov](mailto:griffita@nidcd.nih.gov))

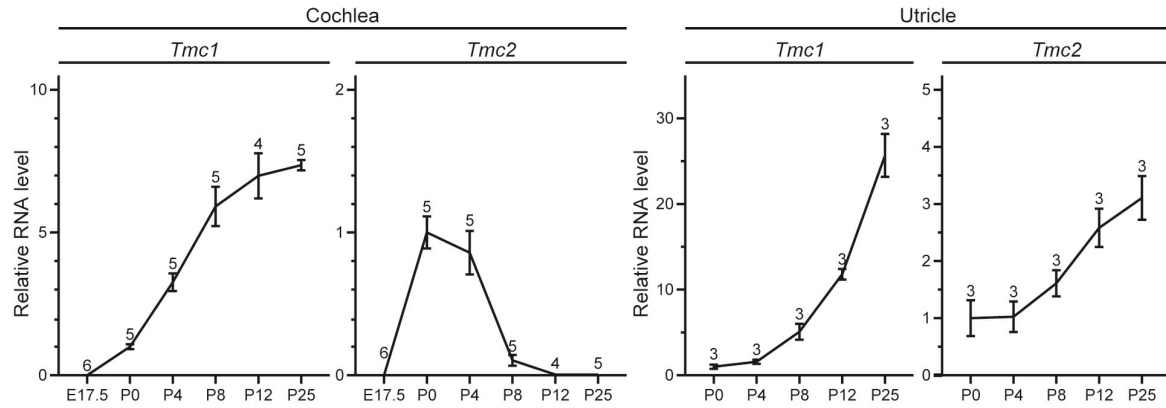

**Supplementary Figure 1.** *Tmc1* and *Tmc2* mRNA levels (mean  $\pm$  SD) of wild-type mouse cochleae and vestibules. *Tmc1* expression was persistent in mature cochlear and vestibular hair cells. Whereas, *Tmc2* expression was transient in early postnatal cochlear hair cells but persisted in vestibular hair cells. The number above each data point and bar indicates the number of mice examined. The mRNA level was first normalized to the *Actb* level and then to its own value measured at P0.

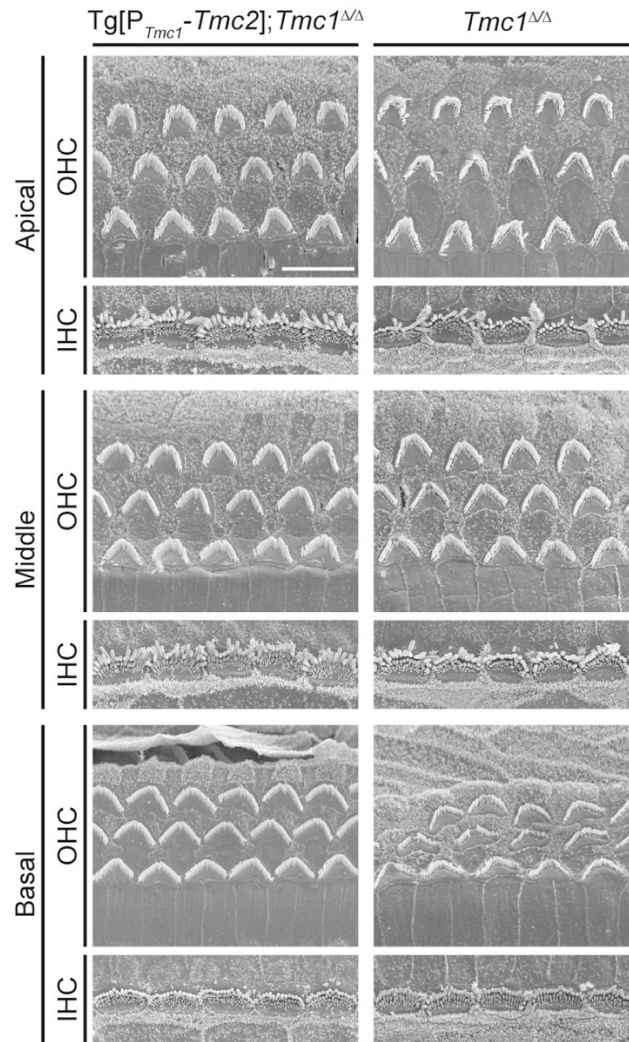

**Supplementary Figure 2.** Hair cell morphology of transgenic mice examined by scanning electron microscopy at P16. Inner and outer hair cell stereocilia bundles of  $Tg[P_{Tmc1::Tmc2}]Tmc1^{\Delta\Delta}$  (n=4 mice) cochleae remained intact from apical to basal turns, while outer hair cell stereocilia bundles of  $Tmc1^{\Delta\Delta}$  (n=3 mice) cochleae are starting to degenerate from middle to basal turns (Scale bar, 10  $\mu$ m).

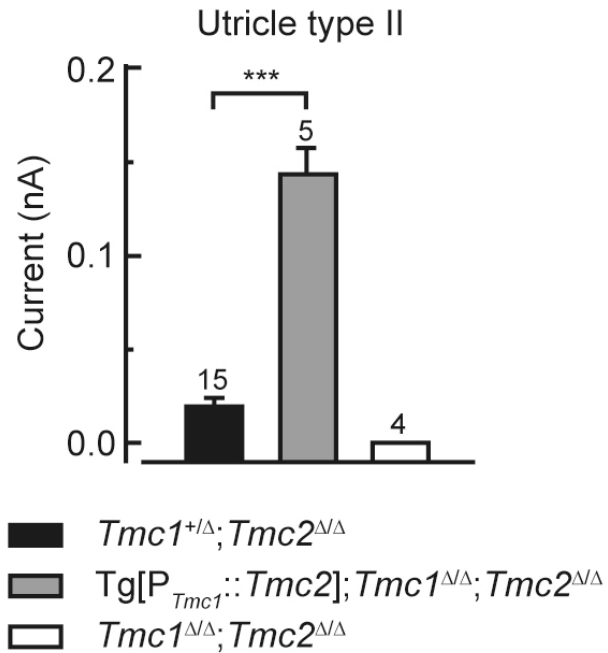

**Supplementary Figure 3.** Whole cell sensory transduction currents of  $Tg[P_{Tmc1}::Tmc2];Tmc1^{ΔΔ};Tmc2^{ΔΔ}$  vestibular HCs at P4-8. The sensory transduction currents of utricle type II hair cells in  $Tg[P_{Tmc1}::Tmc2];Tmc1^{ΔΔ};Tmc2^{ΔΔ}$  are significantly larger than those of  $Tmc1^{+/Δ};Tmc2^{ΔΔ}$  mice (paired *t*-test,  $P < 0.001$ ). The number above each column and bar indicates the number of HCs examined.

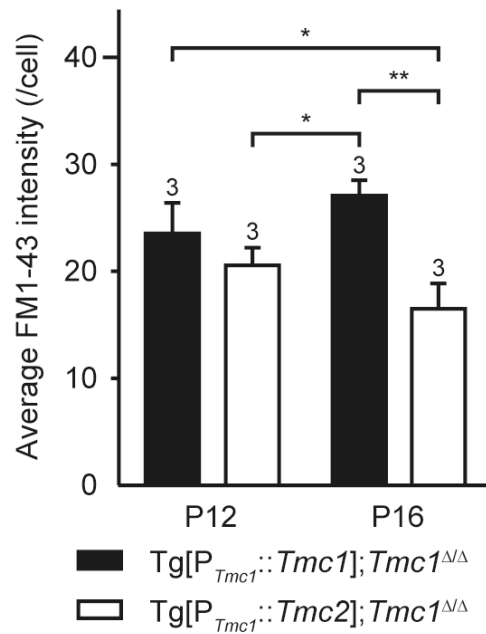

**Supplementary Figure 4.** Average FM1-43 intensity in inner HCs of Tg[P<sub>Tmc1</sub>::Tmc2];Tmc1<sup>ΔΔ</sup> cochleae. The average intensity in inner HCs of Tg[P<sub>Tmc1</sub>::Tmc2];Tmc1<sup>ΔΔ</sup> cochleae is significantly smaller than that of Tg[P<sub>Tmc1</sub>::Tmc1];Tmc1<sup>ΔΔ</sup> cochleae at P16 (one-way ANOVA,  $P < 0.005$ ). Quantitation of FM1-43 intensity was performed using ImageJ (<http://rsbweb.nih.gov/ij/>). The number above each column and bar indicates the number of mice examined.

Supplementary Table 1. Nucleotide primers for quantitative RT-PCR

| Target gene              | Primer/Probe sequence (5' to 3')               | Location of primer/probe       |
|--------------------------|------------------------------------------------|--------------------------------|
| <i>Actb</i>              | F: ACCTTCTACAATGAGCTGCG                        | Exon 3                         |
|                          | R: CTGGATGGCTACGTACATGG                        | Exon 4                         |
|                          | P: /FAM/TCTGGGTCA/ZEN/TCTTTTCACGGTTGGC/IBFQ/   | Exons 3-4                      |
| <i>Tmc1</i>              | F: GGTGCTGGGACTTAGAATATGG                      | Exon 15                        |
|                          | R: TGCCTTGTTGAAGATCAGAG                        | Exon 16                        |
|                          | P: /FAM/AGGACGTTG/ZEN/CCACTGATGTCGAAT/IBFQ/    | Exon 16                        |
| <i>Tmc2</i> <sup>A</sup> | F: CATCCTGCTAATGTTTCTGGC                       | Exons 17-18                    |
|                          | R: ACTATGGCTTTCCCTTGATGG                       | Exon 19                        |
|                          | P: /FAM/TGGTTCTTC/ZEN/TCAACTTCACGGAGCG/IBFQ    | Exon 18-19                     |
| Exogenous <i>Tmc2</i>    | F: GGTCACCTCTGGAAAGAGAA                        | Exon 20                        |
|                          | R: TTTTAAAGCAAGTAAAACTCTACAA                   | 3' UTR of inserted <i>Tmc2</i> |
|                          | P: /FAM/TGGCTGATT/ZEN/ATGATCTAGAGTCGCGGC/IBFQ/ | 3' UTR of inserted <i>Tmc2</i> |
| Endogenous <i>Tmc2</i>   | F: GTCTCAGACTTACACAGCAG                        | Exon 20                        |
|                          | R: ACAGTAGAGATTCAAGCCAAGG                      | 3' UTR of <i>Tmc2</i>          |
|                          | P: FAM/CTGATTTC/ZEN/TGGCATTTCATGGGTGTCC/IBFQ   | 3' UTR of <i>Tmc2</i>          |

Abbreviations: F, forward primer; R, reverse primer; P, probe.

<sup>A</sup>The set of primers amplify exogenous and endogenous *Tmc2*.

Supplementary Table 2. Nucleotide primers for genotyping of transgenic mice

| Primer sequence (5' to 3')        | Target transgene                                              |                                                                                           |
|-----------------------------------|---------------------------------------------------------------|-------------------------------------------------------------------------------------------|
| <i>Tmc1</i> BAC <sup>ΔEx8-9</sup> | F: GCATCCTAGGAAATACCGAAATAC<br>R: GGTTTGCTAAGGTGACAAGTACAA    | Tg ( <i>Tmc1-Tmc2</i> ), Tg ( <i>Tmc1-Tmc1</i> ),<br>Tg ( <i>Tmc1</i> <sup>ΔEx8-9</sup> ) |
| BAC SP6                           | F: GCACAACACATGTTTATTCACCTCA<br>R: CCGTCGACATTTAGGTGACACTAT   | Tg ( <i>Tmc1-Tmc2</i> ), Tg ( <i>Tmc1-Tmc1</i> ),<br>Tg ( <i>Tmc1</i> <sup>ΔEx8-9</sup> ) |
| BAC T7                            | F: GGCCGCTAATACGACTCACTAT<br>R: AGTAGAGTCCAGGCATGCTAAAAAT     | Tg ( <i>Tmc1-Tmc2</i> ), Tg ( <i>Tmc1-Tmc1</i> ),<br>Tg ( <i>Tmc1</i> <sup>ΔEx8-9</sup> ) |
| Inserted <i>Tmc1</i> cDNA         | F: ACAAGAAAATGGCAGCGGCTCGAG<br>R: TTTGGCATGTATATCTAAACAGCATAG | Tg ( <i>Tmc1-Tmc1</i> )                                                                   |
| Inserted <i>Tmc2</i> cDNA         | F: CAGACCCTGGACAAGAAAGCGCAG<br>R: TTTGGCATGTATATCTAAACAGCATAG | Tg ( <i>Tmc1-Tmc2</i> )                                                                   |

Abbreviations: F, forward primer; R, reverse primer.

Supplementary Table 3. Nucleotide primers for genotyping of *Tmc1* knockout mice

| Primer set                   | Primer sequence (5' to 3')                                |
|------------------------------|-----------------------------------------------------------|
| <i>Tmc1</i> wild-type allele | F: GCATCCTAGGAAATACCGAAATAC<br>R: GAAGAATTTGAAAGCAAATCTGA |
| <i>Tmc1</i> knockout allele  | F: GCATCCTAGGAAATACCGAAATAC<br>R: AAACATACTTTCGGTTCCTCTTC |

Abbreviations: F, forward primer; R, reverse primer.
